# Supplementary material for: Modes and models of care delivery in municipal long-term care services: a cross-sectional study from Norway
Source: Springer Nature journal article supplement (doi:10.1186/s12913-023-09750-8), 2023-07-31
Supplement: MOESM1 [file 25869102]

Additional file 1: The main themes of the questionnaire

| Theme                                                                                            | Example of question                                                                                                                                                                                                                                                                                                                                                                               |
|--------------------------------------------------------------------------------------------------|---------------------------------------------------------------------------------------------------------------------------------------------------------------------------------------------------------------------------------------------------------------------------------------------------------------------------------------------------------------------------------------------------|
| Allocation of services                                                                           | <p>Who allocates long-term care services in your municipality?</p> <ul style="list-style-type: none"> <li>• A separate unit for allocating services</li> <li>• Allocation takes place from the services themselves</li> <li>• Other, please specify</li> </ul>                                                                                                                                    |
| <p>Specialised municipal services</p> <p><i>Nursing homes services, permanent placements</i></p> | <p>Some municipalities provide specialised permanent nursing home placements for different patient groups. Please check the box if your municipality provides the following (choosing multiple options is possible):</p> <ul style="list-style-type: none"> <li>• Dementia care</li> <li>• Reinforced dementia care</li> <li>• Neurological disorders</li> <li>• Psychiatric disorders</li> </ul> |

- Substance abuse

*Nursing home services,  
Short-term placements*

Some municipalities provide specialised short-term nursing home placements for different patient groups. Please check the box if your municipality provides the following (choosing multiple options is possible):

- Rehabilitation
- Dementia care
- Palliative care
- Care for people with neurological disorders
- Mental health care
- Enhanced somatic care / intermediate care (for people in need of medical follow-up, typically after hospital admission)
- Care for people with substance abuse issues

*Home care,  
teams*

Some municipalities provide specialised home care teams. Please check the box if your municipality provides the following (choosing multiple options is possible):

- Rehabilitation

- Dementia care
- Palliative care
- Oncological care
- Mental health care
- Care for people with substance abuse issues
- Assistive technology

*Assisted living facilities,  
without staff present\*\**

Some municipalities provide specialised care in assisted living facilities for different groups. Please check the box if your municipality provides the following (choosing multiple options is possible):

- People with dementia
- People with neurological disorders
- People with mental illness
- People with an intellectual or developmental disability
- People with a physical disability
- Older adults

|                                      |                                                                                                                                                                                                                                                                                                                                                                                                                                              |
|--------------------------------------|----------------------------------------------------------------------------------------------------------------------------------------------------------------------------------------------------------------------------------------------------------------------------------------------------------------------------------------------------------------------------------------------------------------------------------------------|
|                                      | <ul style="list-style-type: none"> <li>• People with substance abuse issues</li> </ul>                                                                                                                                                                                                                                                                                                                                                       |
| <i>Assistive technology</i>          | <p>Check the box if your municipality provides one or more of the following types of technology in nursing homes*:</p> <p>(choosing multiple options is possible)</p> <ul style="list-style-type: none"> <li>• Location technology / GPS</li> <li>• Compensation and wellness technology</li> <li>• Safety and security technology</li> <li>• Technology for social contact</li> <li>• Technology for (remote) treatment and care</li> </ul> |
| <i>Health Promotion and Activity</i> | <p>Please check the box if your municipality provides one or more of the following offers for preventive and health-promoting services</p> <p>(choosing multiple options is possible)</p> <ul style="list-style-type: none"> <li>• Home visits for older adults who have limited/do not have long-term care services</li> <li>• Organised physical activity</li> </ul>                                                                       |

- Individual conversations concerning living habits and health
- Learning and mastery services for patients
- Learning and mastery services for family members

*Coordination of care*

Please check the box if your municipality has a coordinator function for  
(choosing multiple options is possible)

- Dementia care
- Oncological care
- Palliative care
- Coordination of patient trajectory (e.g., between primary and secondary health service)
- Habilitation / rehabilitation
- Voluntary service providers
- Substance abuse
- Mental health care

|                                                                  |                                                                                                                                            |
|------------------------------------------------------------------|--------------------------------------------------------------------------------------------------------------------------------------------|
| <i>Other health care services</i>                                | Does your municipality have a psychologist employed by the municipality?<br>Yes/No                                                         |
| Involvement of volunteers in service provision                   | Does your municipality involve volunteers and / or voluntary organisations in providing long-term care services? Yes/No                    |
| Inter-municipal cooperation                                      | Is your municipality currently involved in inter-municipal cooperation on long-term care services? Yes/No                                  |
| Assessment of patient and family member's satisfaction with care | Does your municipality conduct regular systematic patient / family surveys to assess satisfaction with the long-term care services? Yes/No |
| Use of/Purchasing services from private service providers        | Does your municipality purchase long-term care services from private providers?<br>Yes/No                                                  |
| Planning of care                                                 | Does your municipality have a current long-term plan for its long-term care services? Yes/No                                               |

\* Same question asked regarding Assistive technology used in home care. \*\* Same question asked regarding assisted living facilities partly staffed and with 24-hours staffing.
